# Supplementary material
Source: publisher figshare collection journal article supplement (https://karger.figshare.com/articles/dataset/_/6138956)

## Online Supplementary Appendix D

### Use of caffeine, Vitamin A, non-narcotics and muscle relaxants for respiratory management of infants <29 in each network

ANZNN, Australian and New Zealand Neonatal Network; CNN, Canadian Neonatal Network; FinMBR, Finnish Medical Birth Register; ILNN, Illinois Neonatal Network; INN, Israel Neonatal Network; NRNJ, Neonatal Research Network of Japan; SEN1500, Spanish Neonatal Network; SNQ, Swedish Neonatal Quality Register; SwissNeoNet, Swiss Neonatal Network; TuscanNN, TIN Toscane on-line.

■ Routine 90-100% ■ Often 50-90% ■ Sometimes 10-49% ■ Rarely/never 0-10%

#### A. Non narcotics for mechanically ventilated infants

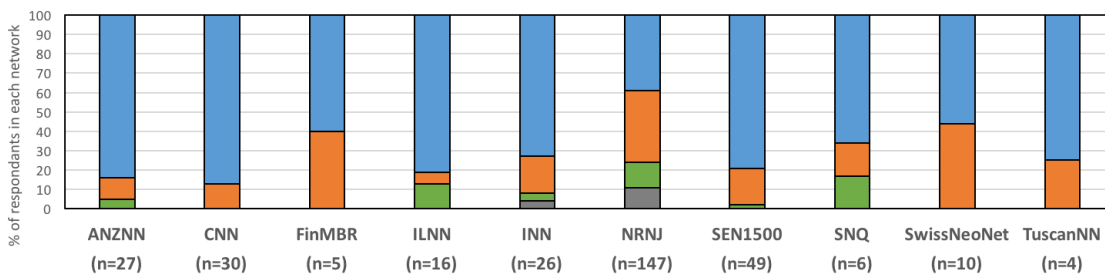

#### B. Muscle relaxants for mechanically ventilated infants

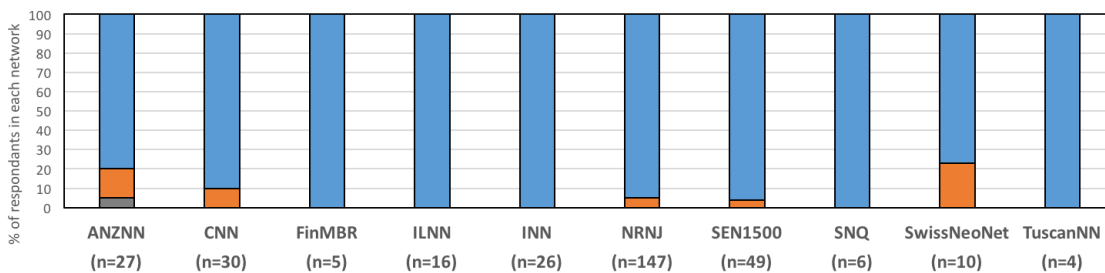

#### C. Caffeine

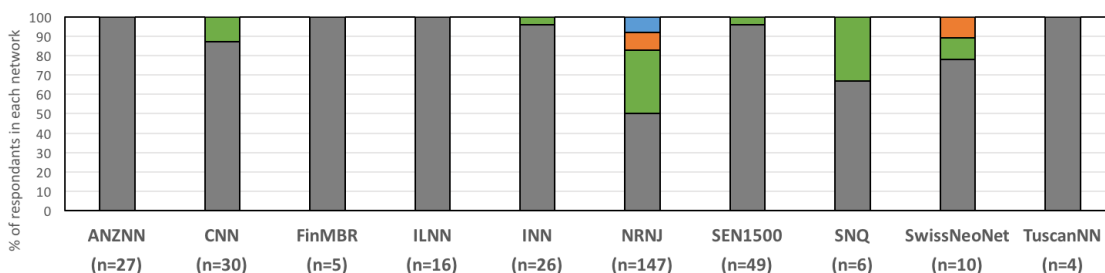

#### D. Vitamin A

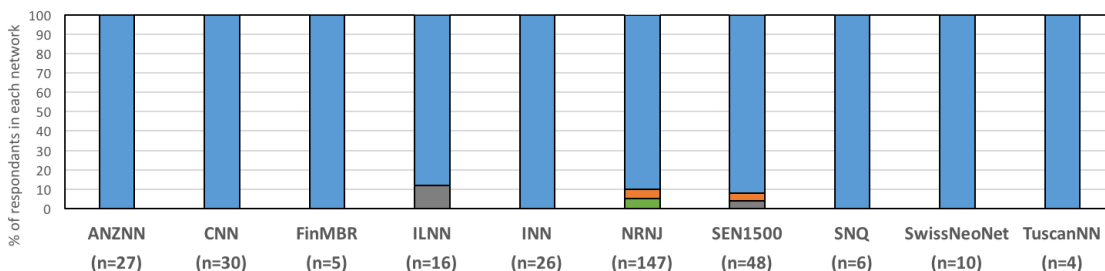

Supplement: Supplementary file 1 [file 1]
